# Supplementary material for: Nisin a probiotic bacteriocin mitigates brain microbiome dysbiosis and Alzheimer’s disease-like neuroinflammation triggered by periodontal disease
Source: PubMed Central journal article supplement (PMC10557354; doi:10.1186/s12974-023-02915-6), 2023-10-06

**A**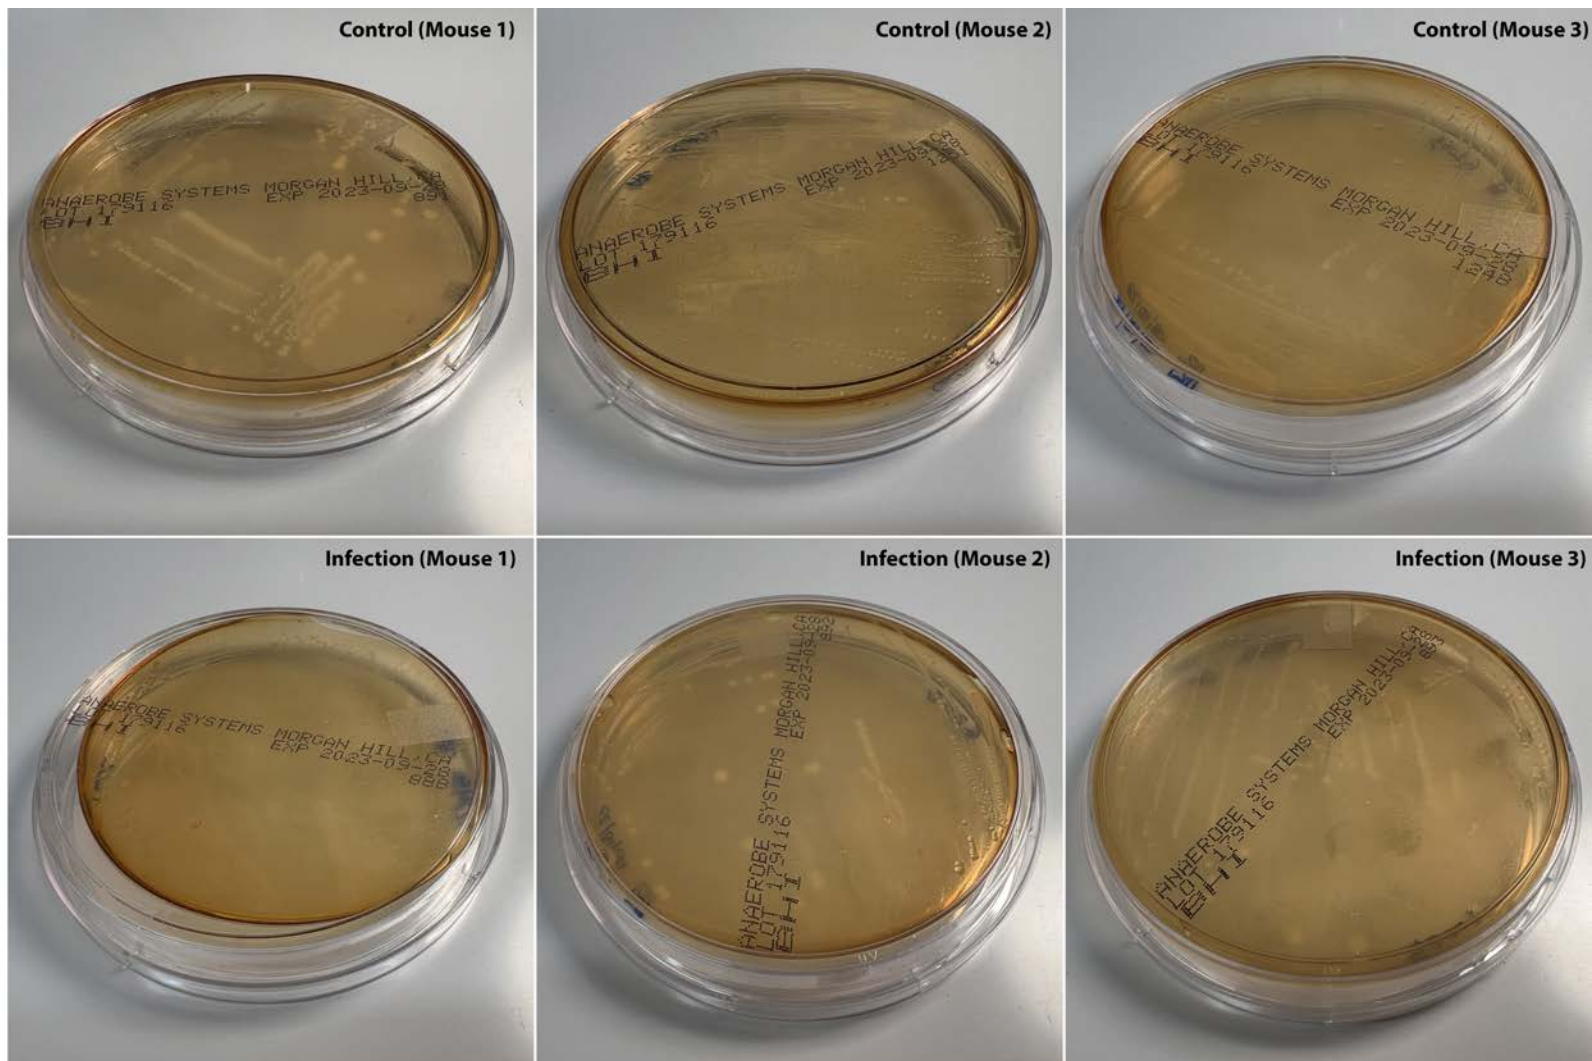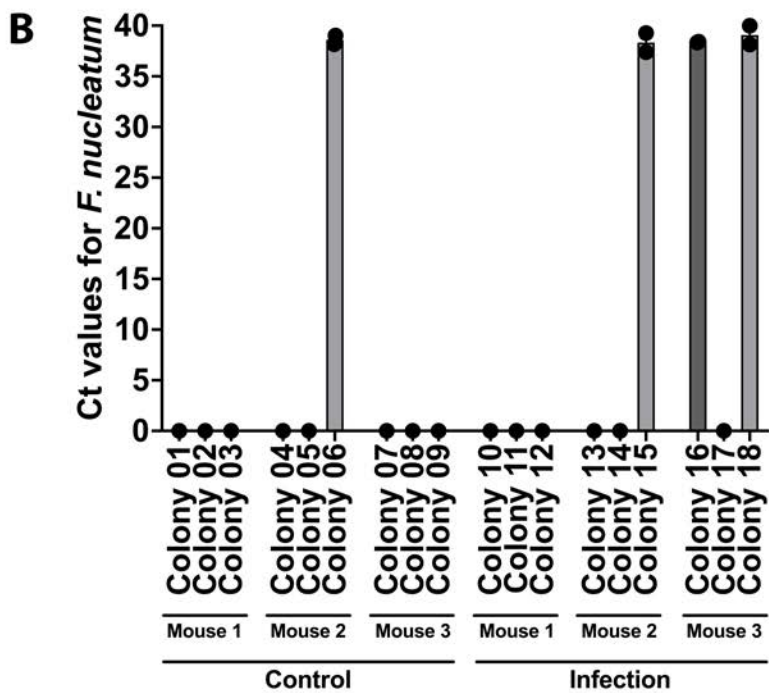

Supplement: 12974_2023_2915_MOESM2_ESM.pdf [file 12974_2023_2915_MOESM2_ESM.pdf]
